# Supplementary material for: Cryptochrome 2 from Lilium × formolongi Regulates Photoperiodic Flowering in Transgenic Arabidopsis thaliana
Source: MDPI journal article supplement (doi:10.3390/ijms222312929), 2021-11-29
Supplement: s1 [file s1]

**Table S1. Primers used in PCR analysis.**

| primer         | sequence                  |
|----------------|---------------------------|
| Clone-LfCRY2-F | ATGGGTTCCCAATTGAAGACTA    |
| Clone-LfCRY2-R | TTAGGGTTCGGCAGGC          |
| Clone-LfCOL9-F | ATGGGGTCAGTTTGTGATTTC     |
| Clone-LfCOL9-R | TCAATAGCTTCTTGTCTGGCAG    |
| Clone-AtCIB1-F | ATGAATGGAGCTATAGGAGG      |
| Clone-AtCIB1-R | CTTAATCAAACCTCCTA         |
| qPCR-LfCRY2-F  | TACTCAAAGCTGCCGGGGTT      |
| qPCR-LfCRY2-R  | GCATTATCCAGCTCCCACAT      |
| qPCR-LfEF-F    | GGCACTAACTCGCTCCTTCTG     |
| qPCR-LfEF-R    | TTGGTAAGATGCTGGTGATTGGAT  |
| qPCR-AtCO-F    | TTGCTTCGTGGCTGTTCCCTAATTC |
| qPCR-AtCO-R    | TCTATCTCCCCCGTAGCTCGTCTGT |
| qPCR-AtFT-F    | TGGTGGAGAAGACCTCAGGAACT   |
| qPCR-AtFT-R    | TCATTGCCAAAGGTTGTTCCAG    |
| qPCR-AtTUB2-F  | ATCCGTGAAGAGTACCCAGAT     |
| qPCR-AtTUB2-R  | AAGAACCATGCACTCATCAGC     |
